# Supplementary material for: Development and Validation of a Novel M6A-related LncRNA Prognostic Signature Associated with Immune Microenvironment for Ovarian Serous Cystadenocarcinoma
Source: Research Square preprint supplement (doi:10.21203/rs.3.rs-1120501/v1), 2021-12-02
Supplement: Supplementary file 1 [file 663b2748554ed529ea48e4da.docx]

Table S1. Primers’ information.

| Gene | Forward primer | Reverse primer |
| --- | --- | --- |
| WAC-AS1 | 5'CAGTGAAGTGGAAGCATGTGTT3' | 5'TTCTTTGACCCTTCCTTTCCAG3' |
| LINC00997 | 5'ATTCCCTAGCATTGCAGCCT3' | 5'TGCTCAGCGATTTCTACCCT3' |
| DNM3OS | 5'GTCCTAAATTCATTGCCAGTTCC3' | 5'CACACTCAAGGGCTGTGATTTC3' |
| FOXN3-AS1 | 5'TGGGACTTGCTTCCTGACCT3' | 5'TGCAGCTTGCTTATTTGTGACT3' |
| GAPDH | 5'ACCACAGTCCATGCCATCAC3' | 5'TCTAGACGGCAGG TCAGGTC3' |
